# Supplementary material
Source: Research Square preprint supplement (doi:10.21203/rs.3.rs-9442405/v1)
Supplement: Supplementary file 1 [file aa27466d19a16da5fd99de60.docx]

Supplementary Material

Table S.1: Summary of each high-level theme which resulted from the inductive thematic analysis, and the codes classified under each theme.

| Theme | Codes | Summary |
| --- | --- | --- |
| Definitions of Sustainability | Agroecology, global versus local, organic, sustainable intensification, trade-offs | Factors contributing to stakeholder definitions of a sustainable ruminant sector, such as the type of production system and the spatial boundary considered |
| Economy | Brexit, cost of mitigation, economic value of farming, farm viability, imports, incentives, market regulation, other sectors, profitability, tax | The role of ruminant agriculture in the economy and the effects of the economy on ruminant production, including where financial responsibility lies, the implications of certain economic policies, and factors affecting financial decision-making such as profitability |
| Emissions Reporting | Corporate reporting, eco-labels, farm reporting, metric choice, national reporting | Perspectives on how different entities report emissions at the corporate, farm, and national scales, including consideration of metric choice, spatial boundary, and data availability |
| Goals and Opportunities | Alternative proteins, animal welfare, beyond GHGs, circular economy, collaboration, efficiency, exporting good practice, food security, peatlands, renewables, resilience, soil carbon, technology, value of land, visions of the future, working with farmers | Views on a wide range of options which would help minimize agricultural emissions, or improve ruminant production against a more holistic definition of sustainability beyond GHGs |
| Methane | Feed additives, GWP* | Stakeholder views on the potential for technological interventions to reduce methane, thoughts towards novel GHG metrics which consider the short-lived properties of methane, and views towards methane mitigation more broadly |
| Net Zero | Biogenic carbon, definitions, offsets, reliance on removals, setting land aside | Considerations of how net zero is defined in terms of which emissions sources are included, which Scopes are included, as well as the role of offsets and removals, and the value of setting land aside for carbon sequestration |
| Obstacles | Allocation of removals, beef versus dairy, effectiveness of interventions, fairness, grazing obstacles, hard to abate, land use competition, leakage, overpopulation, permanence of removals, policy instability, public acceptance, reliance on technology, verification | Perspectives on the significance of a number of technological, physical, political, and social obstacles to decarbonizing ruminant production |
| Perception of Farmers | Cultural value, public goods, reduce farming, role of farmers in society | A range of the ways in which farmers are (or are not) valued by society, such as for their cultural, economic, or social contributions |
| Reduced Production | Herd reductions, shifting diets | The extent to which stakeholders feel that measures which would reduce ruminant production are needed |
| Residual Emissions | N/A | How emissions which cannot be technologically eliminated should be addressed, or thoughts on whether agricultural emissions should be required to reach (net) zero |
| Role of Livestock | Critical of livestock, impact of livestock, in the Global South, livestock is good, livestock is a natural process, nutritional value | A range of views towards livestock in general, ranging from views that livestock production should be reduced or eliminated to those who feel ruminants are nutritionally or ecologically valuable |
| Supply Chains | Certifications, consumer choice, deforestation, emissions data, role of processors, role of producers, role of retailers, supply chain traceability | Perspectives mostly from corporate stakeholders on how they approach data collection and reporting across their supply chain, including views on what roles different actors within the supply chain should play |
| Winners and Losers | N/A | Views on who would benefit from certain measures or interventions, and how to ensure a more fair transition to net zero |

Table S.2: Quotes for the stakeholder mapping exercise shown in Table 3

| CO-CO | If we can discuss with our suppliers in the value chain to set some common targets that we can achieve together, but the challenge is that as long as we are part of this fierce competition on the retail market, it's going to be more or less on a volunteer basis unless you get some external factors like policies that supports that we need to commit to certain standards. - DK.CO.05  They don't want to tell everybody if they've got a kind of a competitive advantage or they are showing they don't want to say we've reduced our emissions and we've reduced our emissions and here’s how They'll tell the customer, the retailer. But they won't necessarily want to divulge it to their competitors. – UK.CO.02 |
| --- | --- |
| CO-FA | [Farmers are] not running a charity. They need to make money. They need to be able to have a good life … and if they're being asked to invest, there has to be a return on that investment, and often they can't see what that return is. - UK.CO.02  I wouldn't expect the farmers to be as engaging with sustainable practices and actually, I think, the way to crack it is actually demonstrating to these farmers that they're doing a lot of these things already, they just don't realize they're doing it. You know, there's things that's contributing towards being more sustainable that they don't consider. Because they're not doing it to be sustainable, if that makes sense. They're gonna be doing it for money, or whatever. But it's actually breaking down that barrier in terms of the knowledge that they have around sustainability. – IE.CO.01  So in the transition of the farmer, it's not just moving from one type of fuel to another type of you know this really has a mindset change as well. Secondly, there’s a lot of focus on the on the feed obviously. [Feed additives] is an intervention that we're doing with the farmers who are open to that, we do not impose anything to our farmers. We provide options. – NL.CO.04 |
| CO-GO | So we are confronted with policymakers, for instance, of the European Union. They say we have signed the Paris Agreement. And that means you have to report to us your carbon footprint. And you do it in this in this format which is relevant for Paris Agreement. Then the European Commission comes and says OK. We have developed CSRD. And into CSRD you have to do life cycle analysis. So you have to report within CSRD according to life cycle and analysis. And that's totally different than what we have to report in the Paris Agreement. While that's only your local footprint and that has nothing to say. – NL.CO.02  The farming 25 year road map green energy transition CCC 7th assessment report. All of which could be deemed as an effort to restrict livestock numbers, thereby driving up the cost of meat and reducing consumption. -UK.CO.02 |
| CO-RE | I don't even want to discuss with [green NGOs], because there's a fact that says that the demand for protein, animal protein, will rise with between 20 and 30% So if we lower the animal production in Denmark or Europe, we'll just get the animal production from South America. -DK.CO.03 |
| FA-CO | And then we have young lads. He was born with horses, and he went to a dairy farm, and he's now a tillage advisor. I go *hmm*, there's no tillage in his background whatsoever. He might have spent six months going around, looking at places, yeah, right, and then I’m to ring him, asking him about crops? – IE.FA.02 |
| FA-FA | Well, I think we have three types of farmers. We have in front runners, we have the big middle group, and then I shouldn't call them losers, people who are close to not caring, and they are not considered. They don't care so much, they just want to quit some time and get out of the business as best as possible. – DK.FA.02  So it kind of gets back to this remit of farmers are delivering multiple public goods on behalf of the nation. So as well as affordable, nutritious food, you know, we're asking them to reduce emissions but increase carbon storage and improve water quality and stop water flooding our homes and increase biodiversity. And all make the landscape nice. – UK.FA.01 |
| FA-GO | The government is now not really supporting entrepreneurship. So many farms got a permit to build a barn, but then the court rejected those permits… –NL.FA.02  We're done with ELMS, we've done with SFI rubbish and you know, spent all the money because all the well heeled land owners got their agents to milk the system. And a lot of genuine farmers missed out. –UK.FA.03  And it's, of course, very difficult, because you can sit here in Copenhagen and be in dialog with the authorities and the NGO on environment and find a solution and the farmers. He's, of course, not involved. – DK.FA.01 |
| FA-RE | [NGOs] always talk positive about the farmer, because the farmer, he tries to do his best, but he's ended in a situation with a too big farm, after their opinion, and farm with too much pressure on the environment. But if you look at some of the small groups, which are very they are attacking in the media, even they go into the farm, take videos of the production and try to make stories about how bad an industry it is and that we should stop that kind of farming we have at Denmark. – DK.FA.01  All of a sudden we've got ELMs, which is, you know basically, run by NGOs, you know, I mean it was the test and trial projects that created the options under ELMs were not funded by government. So they were dependent on well funded organizations like National Trust like soil association, like RSPB you know you've obviously carved out all these options that favor feeding birds and insects over humans. – UK.FA.03 |
| GO-CO | I suppose we're talking about climate action plans and national targets and global targets for we're focusing on the on, on the headline figures of emission, as opposed to the intensity piece. Yeah, whereas your food producers will maybe focus more on the intensity. – IE.GO.02  I guess the companies, they're not looking at an economy wide target. They're looking at a target within their own business so the sectors can be blurred. – UK.GO.01 |
| GO-FA | Basically you can turn up the CO2 tariffs, you can just turn it up, and then that will reduce the amount of gas. Because then you will basically make it more expensive to be a farmer and then the farms will start closing. And that's basically not a problem for the Danish economy, because the Danish farmers don't make that much money, and they'll get job in other industries. – DK.GO.01  So we don’t get involved in that debate because if we did. It would be. Well, what we want to avoid the situation where [government agency] is portrayed as telling the farmers, they have to do this, which is adversarial and counterproductive, much like in the good old days prior to Brexit, say, well, the EU wants us to do this. In fact, it's in our own interest to do this, but we're able to say, well, someone else wants it. So we're trying to avoid that. – IE.GO.01  So intervening in agriculture has proven to be politically very, very sensitive. So basically, there hasn't been a political majority to do so, or at least to go for those more mandatory policies. – NL.GO.01 |
| GO-GO | So we're not shoving. It might feel like that. That's not our job. To shove something down. It's to work collaboratively and part of setting the sector is what is feasible? – IE.GO.01  But if you want to [change policy], it will take a whole different legal system, which will take five to six years if we can ever implement so you cannot go so fast in policy. – NL.GO.01  We live in a democracy in which successive governments don't like to tell people what to do. It's not just the color of the government. Yeah, they don't really want to do it. They might impose a bit of a tax on things they think are particularly harmful to people. That's about as far as they go. And there certainly wouldn't be any appetite for banning meat or limiting the consumption of meat. – UK.GO.02 |
| GO-RE | And there'll be some academic out of Cambridge who pops up and goes, What about this concept? And we'll be back to where we started. That's a risk for the policymaker. There's so much noise in the system that it delays action. -IE.GO.01 |
| RE-CO | Neutrality in 2050 you know, I remember that this vision came. I think it was in 2019, you know, where [processors] said it [farm interest group] said this and it was just politics, right? It was just to kind of say we go in the green way. We have no idea how to do it. And I guess maybe that's quite common, but I have not seen anybody making concrete plans. – DK.RE.05  I'm not so sure [companies] know how to measure stuff in this. And all of the other companies making claims about this stuff and the other, like what? I mean, yeah, until you can go out and dig a hole and measure the amount of carbon in the soil. If you're not doing that, then it’s speculation. (IE.RE.03)  So we don't use [enteric methane inhibitors] commercially, yeah. There has been a pilot feed additives demonstration on a number of commercial farms there in the last year, so winter 2023-24. There is a lot of nervousness within the dairy industry relating to the use of feed additives to reduce emissions. This primarily relates to the impact that mis-information about a UK pilot project on feed additives in 2024. Currently milk from these research trials is not accepted for human consumption by Irish dairy co-ops.  – IE.RE.04  I discussed this also with people from industry, where I said, you really have to put effort on making your efforts visible, yeah, and your reduction of footprint visible, and also make clear that, hey guys, you won't see it in the national inventory, but you will see it in the footprint of the milk. – NL.RE.01 |
| RE-FA | So you have a situation where, I mean, I would say, if you ask most Danish farmers, like last year, what is your CO two emission per liter of milk, they would know. You would already have had a system where, where you would have calculated this for your farm, but you also have incentives. – DK.RE.01  Farmers are very hesitant to do any investments. Have been for the last couple of years, because they don't know what will happen in five years time. They know that a CO two tax is coming, but farmers have maybe always been criticized, but especially the last 10 years, right? They are to blame for everything. – DK.RE.05  But farmers here, rebellious factions actually within co-ops are now saying, see this sustainability stuff is complete ********. What you're asking us to do? Look at what they're doing in the states. They're just going to produce the milk and they're not going to be held back. – IE.RE.02  What I was seeing was that farmers didn't know where to start. They didn't know what to do. They knew environmental sustainability was important and of course farmers don't want to pollute the planet, they want to become more efficient. – UK.RE.01 |
| RE-GO | National priorities is also doubling the area the organic production, organic farming production and organic farming area, which will reduce productivity and to me, without any very obvious reasons, I mean organic production, as I see it, compared to modern, conventional production in Denmark is not creating so much, let's say environmental benefits so it to me, it doesn't make sense. – DK.RE.03  So when I talk to people in government and issues of metrics comes up they often say “I don’t care what metric is used, we have to start reducing emissions. And that's the real challenge…It's now a matter of trying to deliver on [the national strategy], and that needs a whole of government and whole of industry approach to get behind that and go right. We’re serious about this.  – IE.RE.04  The noise of support from government has not been helpful because it hasn't been connected and it hasn't been clear. – UK.RE.01 |
| RE-RE | On the other hand, as I see it, the public opinion is extremely determined by the green NGOs, in Denmark, what we were usually calling a civil society, it's very, very powerful talking about farming. And that's bit strange to me. – DK.RE.03  And animal agriculture is so controversial for so many other reasons that I see environmental NGOs, for example, who totally reject the GWP* metric because they think it gives a free pass to agriculture missions. And in a sense, they don't like animal agriculture anyway. So this is just another kind of argument that you might use, apart from animal welfare concerns and water quality and so on, to actually limit the size of animal agriculture. – IE.RE.01 |

Table S.3: Data behind the summaries shown in Figure 1, which illustrates the relationship between views towards GWP* and the perceived urgency of ruminant GHG mitigation.

| Quadrant | Quotes |
| --- | --- |
| GWP*+, urgent | I think in future when the blame game has been played for climate change, you know [methane] would have to be taken into account. And so GWP star, the role is … to get to a point where you slam on the brakes and stop. End your contribution to global warming as quickly as you can, and GWP star and warming impact studies help you do that. (IE.RE.05)  We looked at GWP* quite a lot actually. Ultimately we shied away from using it because we didn't want to introduce a new metric to the system. We were obliged under the under the Act to report using conventional reporting. So to quantify our carbon budgets in terms of GWP 100, which we did… we should always be concerned when we are arguing for something that actually falls in our favor. The reason why we have to be careful, even if it's not conscious in our own pleading and promoting a temperature based approach to climate neutrality, that we aren't doing a bit of special pleading here because the gas that it most impacts is methane and our treatment of methane is directly impacted when if you adopt the temperature approach. I personally don't think we are specially pleading. I think methane should be treated differently because it is different. It is the recognition of that that would allow us to mitigate methane emissions as aggressively as we can. (IE.GO.03)  Scientifically, [GWP*] makes a lot more sense, but it makes the accounting somewhat more difficult for policymakers and so on to grapple with, because they would just prefer to have simple conversion factors and so on. (UK.FA.02)  Even GWP* at a national level disincentivized mitigation of methane emissions from sectors like agriculture. And put most developing countries at a disadvantage compared to developed countries. And it also says it's more advantageous metric for countries that have large historical methane emissions because it suggests that reducing methane emissions leads to global cooling. (UK.GO.01)  And equally incentivized reductions at all, you know at the individual farm level, you know, if a farm can demonstrate that is achieving a permanent reduction in the rate of flow and demonstrate and verify are key here. Then they are producing a cooling effect that is, gives the rest of the economy time to adapt if you like, or is a valuable service to the rest of the economy. (UK.FA.04)  Having said that, permanent reductions in the flow rate of methane do cause well, let's call it cooling, but they reverse past warming from the methane. So there's still an important lever to pull and I’m not saying we shouldn't reduce methane. We can and we should, because it has an important effect. There's just a balance to be had between good reductions in nitrous oxide and reductions in methane, properly valuing the reductions in methane and recognizing their contribution. (UK.FA.04)  So [GWP*] doesn’t exactly help us in in that sense, it does, I think put a better light on agriculture if methane as not having as big an impact as it's currently measured to be so Irish agriculture somehow doesn't have a problem. But it does. Don't get me wrong, it does have a problem. (IE.RE.03)  Methane obviously has quite a big cooling effect if you reduce emissions, but in Ireland methane emissions increased slightly over the last decade. So for the next 16 years, if we started to reduce emissions tomorrow, we still have the warming effect from this increase, which is primarily associated with the increased number of dairy cows.  (IE.RE.04)  So I think that the criticism of GWP star is just misguided and it's really not addressing the real issue is that if you look over the full historic period, all developed countries have had a very large contribution to warming and they will need to, even though much of that warming took place in a time where people were not really particularly aware of climate change. But that doesn't really matter because your actions have consequences. (IE.RE.05)  Ultimately where you start from shouldn't really influence your direction of travel because even if we do have a new methodology, obviously it might dictate slightly different ways of how we get there. (UK.CO.01)  I think I can't see how you can use GWP* in corporate reporting or on a product level, that doesn't make sense for me. But if you model on a global level, I think it's the right one. (DK.CO.02)  But I'm going to take your point on in your paper, which I think is exactly the point. All metrics are wrong, but some are useful and they tell us different things, and GWP* tells us something different from GWP100 yeah, the heating capacity impact of the gas versus a carbon auditing account. So GWP star has its use but it doesn't give us the end game of removing that that methane which we critically need to do (UK.RE.01)  You know, as the world is warming up and GWP star actually emphasizes that we should be doing everything we can to reduce methane (UK.RE.02) |
| GWP*+, less urgent | Biogenic methane should be accepted as long as we are not expanding, (DK.FA.02)  Our grasses can absorb CO2 through the methane cycle (NL.CO.03)  Now when I first started thinking about this stuff, which is a good 15 to 20 years ago. I would have said that gives us time to kind of consider what we would do in the longer term. For me, agriculture biogenic methane I think we've lost that time. So for agriculture methane, now is the time to address it as well as all the other forms of methane. And it isn't special pleading. Out to 2030 and even as far as 2040, GWP100 will work fine. It'll create an appropriate enough signal to reduce all the gases involved. Actually, I think it doesn't give you enough of a signal for methane to reduce methane emissions because it underestimates what the reduction of methane would actually achieve in the real world climate. But if you continue the use of GWP 100, beyond that you will be asking more of methane than is necessary to achieve the climate objective… can you achieve net zero seem to net 0 gases with ruminant agriculture? The long answer is no. The shorter answer is you can try. And in trying you will be asking the sector which is producing the methane emissions to pay for removals of CO2. And that will not be fair. Because they didn't put the CO2 there. (IE.GO.03)  As my understanding is that if we change the accounting change to, say, the end of the, also apply that to the baseline and we still have to make a 30% reduction. So it doesn’t exactly help us in in that sense, it does, I think put a better light on if methane is not having as big an impact as it's currently measured to be Irish, agriculture somehow doesn't have a problem. But it does. Don't get me wrong, it does have a problem, but I mean it's not as it doesn't seem as big. (IE.RE.03)  You know, even it would be impossible, I think, to hit a net zero GWP 100 net zero greenhouse gas by 2050 without decimating that industry, but. With the temperature neutrality approach you do, it gives you more possibility to keep that industry in fairly healthy state over the next few decades. (IE.RE.05)  So we are really excited, really interested in understanding more about that. Certainly for our efficiencies and how that might actually turn the dial from beef is our number one risk area to actually beef is in a really good place. (UK.CO.01)  you know we wouldn't be able to [reach net zero] unless of course we could use GWP star to offset our methane. (UK.RE.01)  I follow a Northern Ireland farmer on Tiktok. I love him, last year, he did a whole, it could be maybe four or five minutes of a TikTok. And he had all the graphs done and all that. Like what you said about the methane. It's there. It's level. It doesn't change. Why you're blaming the cows for it? It makes no sense. Yeah, so I'd agree. There’s no real change. (IE.FA.02) |
| GWP*-, urgent | We don't want to take the easy route as such if we can find a calculation that makes things look better, then just jumping on that because that's going to have repercussions further down the line. (IE.CO.01)  To have two farms with same emissions, but providing different carbon footprints, even though it's exactly the same. It's not intuitive, like, you know, opposite to intuitive. And I think it also because with GWP star is the one that has emitted the most and are reduced, will have lower carbon footprint. So it kind of promotes that good to be bad, And that, I think, is wrong. (DK.CO.02)  There's a reputational risk about looking to be perceived to pick the more advantageous the balance be picking, the more advantageous definition for your particular circumstances. But maybe that is also the more scientifically robust. (IE.GO.01)  GWP* isn't going to be a savior in the short term as it will increase the warming effect associated with the increased methane emissions. It could be really damaging to you, (IE.RE.04)  You can use [GWP*] to justify inaction. That would be an abuse of the metric. That's not what is intended to do, I think. When you have vested interests involved in these things is your you hear all kinds of stuff, you know, it's up to policymakers to see through all that and to come to their judgment (IE.RE.05)  Well, what's the difference between the GWP* and the GWP 100 because some people also want to add it up. If you would do it at school, your math teacher would really hit you, because the GWP* is a change in an emission rate, whereas a GWP 100 is an emission rate. You can't add them up because they're different units, but many people do because it suits them. (NL.RE.01) |
| GWP*-, less urgent | None |

Table S.4

| Interviewee | Quote |
| --- | --- |
| DK.CO.01 | “So step one, reduce all that you can and then, if possible, you can buy some credits somewhere… you can reduce your impact to a certain degree, and then you need to compensate for the rest. In most cases, I do not know of any that can go to net zero without using compensation in some way.” |
| DK.CO.02 | “So we want to be fossil free in the value, or as well, is the idea, and then to minimize the rest of the emissions, but again, we will never get to zero, so you need to balance this out in one way or another. And then, of course, that big question is, how do you do that? Because we are one of the few sections I think that can do something in our own value chain, like with carbon sequestration.” |
| DK.CO.04 | “Actually, personally I don't like the word climate neutral because I think it's. It's difficult to say, but I don't think it's possible…we are human and we use resources to a lot of things... I don't know what we can do… but neutrality is a big word.” |
| DK.FA.01 | “We have it in Denmark for the society as a whole, we have to be neutral in 2050 or 2045 the agriculture will, I think, still have some emissions in 2045 but if we have a lot of pyrolysis, we can do a lot there. So it depends, because we can capture CO2 from the industry, and we can capture the CO2 with the nature that could be new forest, or that could be by the annual crops you have, they take up enormous amount of CO2 but it's going around.” |
| DK.RE.01 | “So, net zero emissions means not 0, but it means a certain amount of emission and a certain amount of sequestration” |
| DK.RE.03 | “I mean, it must be that the emissions, we will always have residual emissions, that emissions are balanced with some uptake. It could be in forest. It could be carbon content in agricultural soils, and especially I think that the biochar has potential there, because we can say that the carbon is there and it will stay there” |
| IE.CO.01 | “But yeah, we have our sustainability strategy and that's basically our road map to net zero across our entire business by 2040. And then within that we have like reducing SCOPE 3 emissions intensity…I think it's unlikely that agriculture as a whole will achieve net zero. Let's be realistic, but I think it can contribute towards that net zero target, you know, can reduce direct emissions from farming, increased carbon sequestration through vegetation. And then reduce emissions in other sectors, so like producing renewable energy with solar panels, and things like that.” |
| IE.GO.01 | “In in the Irish context, I suppose what we're finding is it doesn't really matter what definition of neutrality in the real world. The level of reduction. How much you have to reduce it's actually get on with reducing is the big sticking point” |
| IE.GO.03 | “Can you achieve net zero with ruminant agriculture? The short answer is no. The long answer is you can try. And in trying you will be asking the sector which is producing the methane emissions to pay for removals of CO2. And that will not be fair. Because they didn't put the CO2 there.” |
| IE.RE.01 | “As I understand it, the Commission is quite explicit that they do not reach a net balance in emissions using the GWP 100 metric by 2050 but their presumption is that CDR technologies would be available to meet that gap. So it's not physically possible anyway to produce food without GHG emissions, but they don't have to go to zero.” |
| IE.RE.02 | “I don't understand what [net zero] actually means for ruminant agriculture, because there will always be emissions. People need food.” |
| IE.RE.03 | “Well, I think net Zero's creative accounting. Full stop. It's an impossibility if we want to exist as humans, we have to get over the fact that we're going to have an impact on the environment. Full stop. Net 0 is certain for corporates to push so they can feel good, you know.” |
| IE.RE.05 | “You know, even it would be impossible, I think, to hit a net zero GWP 100 net zero greenhouse gas by 2050 without decimating that industry, but. With the temperature neutrality approach you do, it gives you more possibility to keep that industry in fairly healthy state over the next few decades.” |
| NL.CO.01 | “I think it's kind of fair to say we are in line with the Paris Agreement. But to be really net zero, you have to have the reductions of, Well, depends on what sector you're in, but 90% reduction and then residuals can be compensated somehow, but it changes every year how it can be compensated.” |
| NL.CO.02 | “I like the ambition. But speaking out an ambition which is. Not reasonable to reach, and also within the future somewhere. You're not there anymore on that position you are now crazy. So, we should not give these people this type of words to use them because you know they are going to use it and do nothing.” |
| NL.CO.04 | “A couple of years ago, [company] was still behind carbon neutrality as one of the elements, but we got feedback and we thought, yeah, this is just not the right concept. Net zero, that is the way to go. It's so relatively new, the whole net zero discretion, there will be many more developments coming and we as [company] are open to this kind of discussion because it's not about us, it's about a proper future of the world. It's about ensuring that we are able to grow crops that we can feed the world population and limit global warming to just one and a half two degrees” |
| NL.RE.01 | “And also the industry aims at net zero, if you look at the goals of [companies], they want to go to net zero in 2050 and 50% reduction already in 2030 but in fact, in agriculture, in fact, in all agricultural systems, you can't go back to zero. So it means that you need also sequestration. Well, some people have very high expectations of sequestrations in pastures.” |
| UK.FA.01 | “We could get to net zero easily. Just don't produce anything… I don't think we should be aiming for every farm to get to net zero. You know, that too is unrealistic.” |
| UK.FA.02 | “But you know you can't cut emissions from economic activity by 100%. You have to cut them as far as you reasonably can, and then you have to look for counterbalancing greenhouse gas removals to set against your unavoidable, resilient emissions… What you have to do is to remove your carbon offsets as rapidly as possible into actual removals, and those could be nature based or engineered. But then given some of the doubts around nature based removals with their additionality and permanence and everything, you need to have a diverse portfolio of greenhouse gas removals.” |
| UK.GO.01 | “You talk about climate neutrality in agriculture, but we don't think that's a possibility because we separate out LULUCF and agriculture. So for us, agriculture is a hard to decarbonize sector and LULUCF is where you have the removals. So it's LULUCF that's going to have increasing importance into the future” |
| UK.RE.02 | “You can get probably more than half of it through farming measures and then the other half has to come from diet change to less carbon intense foods.” |
